# Supplementary material
Source: PubMed Central journal article supplement (PMC4019141)
Supplement: JVI.03819-13_zjv999098953so1.pdf [file JVI.03819-13_zjv999098953so1.pdf]

**Supplementary Figure S1:** The specificity of each HEK293-hTLR-luc cell line was determined by testing its stimulation by every other TLR ligand in a dose response experiment. Each HEK293-hTLR-luc cell line was stimulated with serial dilutions of the TLR ligands FSL-1 (hTLR2, hTLR2/6), Poly[I:C], LPS (hTLR4), Flagellin (hTLR5), R848 (hTLR7, hTLR8) and ODN2006 (hTLR9). Luciferase activity was measured in relative light units (RLU): Each cell line could be stimulated with its respective control ligand. In contrast, poly[I:C] did not only stimulate HEK-hTLR3-luc, but also HEK-hTLR5-luc and HEK-hTLR7-luc. Plain square: HEK-hTLR2-luc, plain triangle: HEK-hTLR3-luc, plain circle: HEK-hTLR4-luc, open square: HEK-hTLR5-luc, inverted plain triangle: HEK-hTLR2/6-luc, plain diamond: HEK-hTLR7-luc, open triangle: HEK-hTLR8-luc, inverted open triangle: HEK-hTLR9-luc.

Specificity was observed for all ligand / HEK-hTLR-luc combinations except for poly[I:C] which stimulated HEK-hTLR3-luc, but also HEK-hTLR5-luc and HEK-hTLR7-luc. We ascribed this to endogenous TLR3 expression. In support of this, stable transfection of HEK-293 cells with the NF- $\kappa$ B-inducible luciferase expression cassette resulted in cellular clones in which luciferase activity was induced with the TLR3 control ligand poly[I:C] (**Supplementary Figure S2**).

**Supplementary Figure S2:** HEK-293 cells, “naturally” TLR3-positive, were stably transfected with NF- $\kappa$ B-inducible luciferase expression plasmid. Isolated clones were stimulated with poly[I:C]. The fold-induction of luciferase activity in different clones varied greatly.

**Supplementary Figure S3:** NAB2+Lipofectin, NAB2 or Lipofectin were tested in all HEK-hTLR cell lines in dose response experiments. The highest doses tested were 0.3 µg NAB2 and 1.5µg Lipofectin, mixed or individually (black histogram). Three-fold serial dilutions thereof (1:3, hatched histogram; 1:9, dark grey histogram; 1:27, light grey histogram; 1:8, white histogram) were tested, and fold-inductions of luciferase activity were plotted. NAB2 alone stimulated HEK-TLR3-luc and the cell lines with supposed endogenous TLR3 activity HEK-TLR5-luc and HEK-TLR7-luc, NAB2+Lipofectin stimulated all cell lines. Lipofectin alone had no effect. At high concentrations of NAB2+Lipofectin, fold-inductions in several cell lines regressed, most likely due to toxic effects.

**Supplementary Figure S4:** RT-PCR on total RNA selected from all HEK-TLR-luc clones and HEK-293 cells. hMDA-5 and hRIG-1-specific RT-PCR was carried out with commercially available primer sets (Invitrogen). (1: HEK-293; 2: HEK-hTLR2-luc; 3: HEK-hTLR3-luc; 4: HEK-hTLR4-luc; 5: HEK-hTLR5-luc; 6: HEK-hTLR6-luc; 7: HEK-hTLR7-luc; 8: HEK-hTLR8-luc; 9: HEK-hTLR9-luc; c: control). In all cell clones, rig-I and mda-5 transcripts can be detected.

**Supplementary Figure S5:** NAB2 and NAB2+Lipofectin were tested for their capacity to stimulate human plasmacytoid dendritic cells. pDCs were incubated overnight with the TLR9 ligand ODN2006, the TLR7/8 ligand R848, NAB2, Lipofectin and NAB2+Lipofectin. In this representative experiment, only the TLR7/8 ligand R848 induced the secretion of IFN-α, while the TLR9 ligand ODN2006 induced the secretion of high amounts of IL-6. The secretion of Mip-1β and TNF-α were equally well induced by ODN2006 and R848. In contrast, NAB2, Lipofectin or NAB2+Lipofectin did not induce secretion of any of these cytokines.

**Supplementary Figure S6:** Determination of suboptimal dose of MVATG9931: Survival in C57BL/6 RMA-MUC1 tumor model was monitored after vaccination with different doses of MVATG9931. Best protection was obtained with MVAT9931 at viral doses of  $1 \times 10^5$  and  $5 \times 10^5$ . The viral dose of  $1 \times 10^3$  pfu MVATG9931 was considered as “suboptimal” and chosen to assess the efficacy of adjuvant candidates. An empty viral vector (mock MVA vector) at highest dose ( $5 \times 10^7$  pfu) had no effect.

**Supplementary Figure S7:** Effect of injection schedule: Survival in C57BL/6 RMA-MUC1 tumor model was monitored after vaccination with the suboptimal dose of MVATG9931 ( $1 \times 10^3$  pfu) and NAB2+Lipofectin. The mixture of NAB2+Lipofectin was injected at the same site either at the same moment, or timely deferred 6h or 24h after virus injection. To augment vaccination efficiency, NAB2+Lipofectin had to be injected several hours after MVATG9931. No benefit was observed when viral vector NAB2+Lipofectin were co-injected.

**Supplementary Figure S8:** Extra- and intracellular presence of TLR3 in HEK-hTLR3-luc cells: HEK-TLR3-luc cells were permeabilized or not and labeled with an anti IgG1 isotype control antibody (black line) or anti TLR3 (grey line).

# Supplementary Figure S1

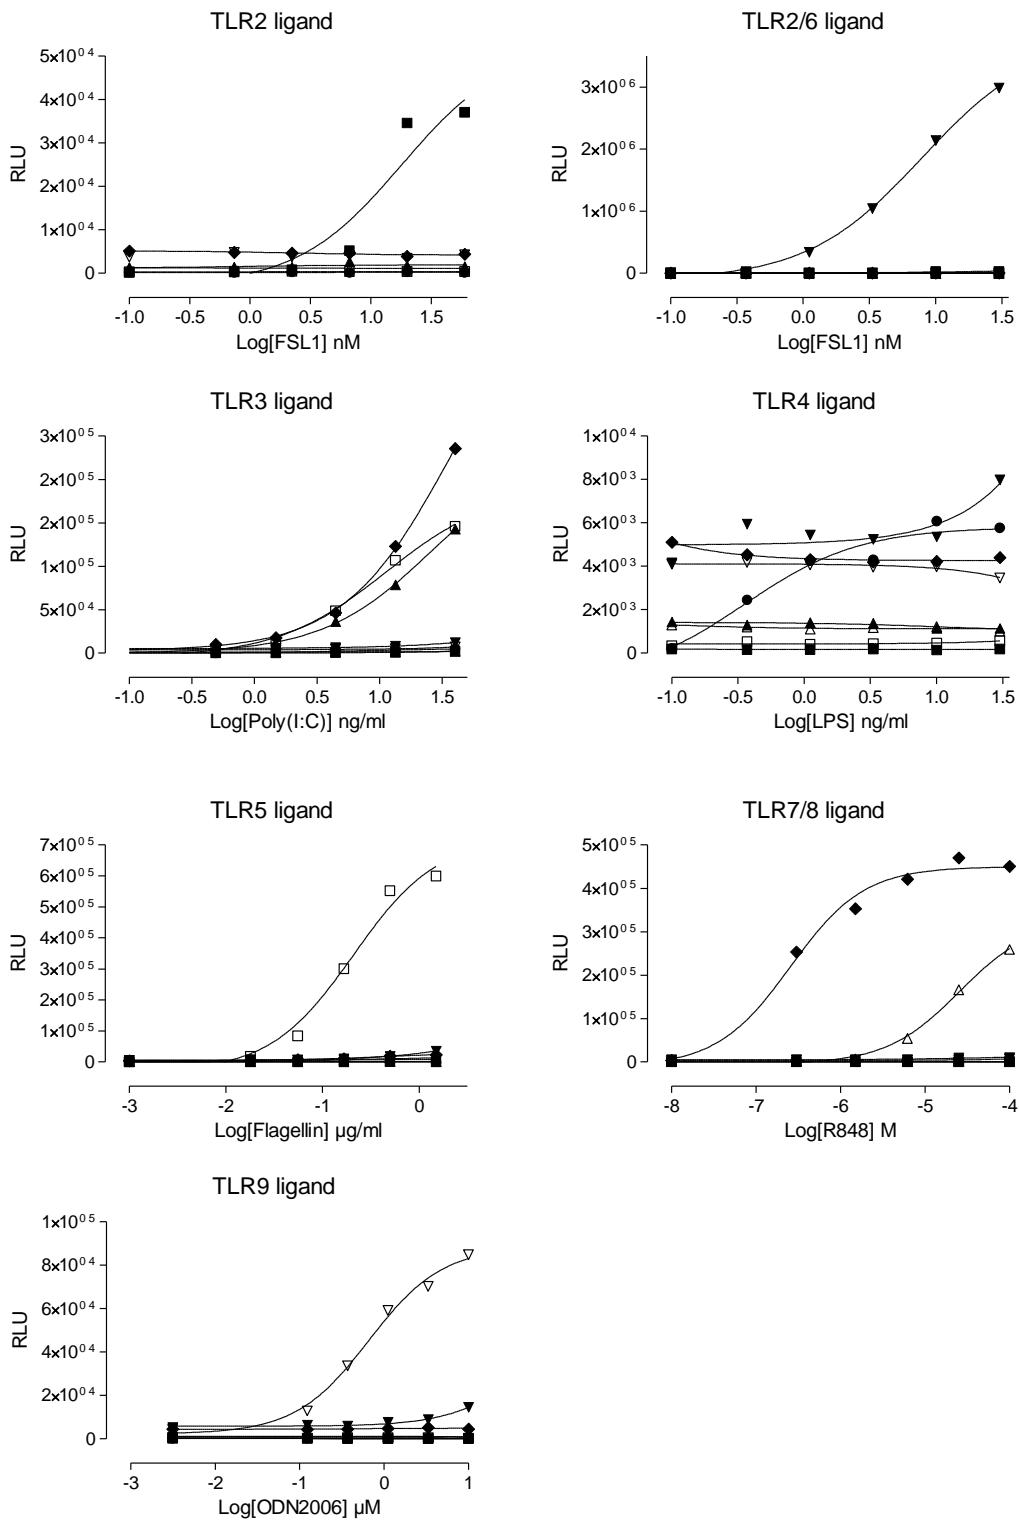

## Supplementary Figure S2

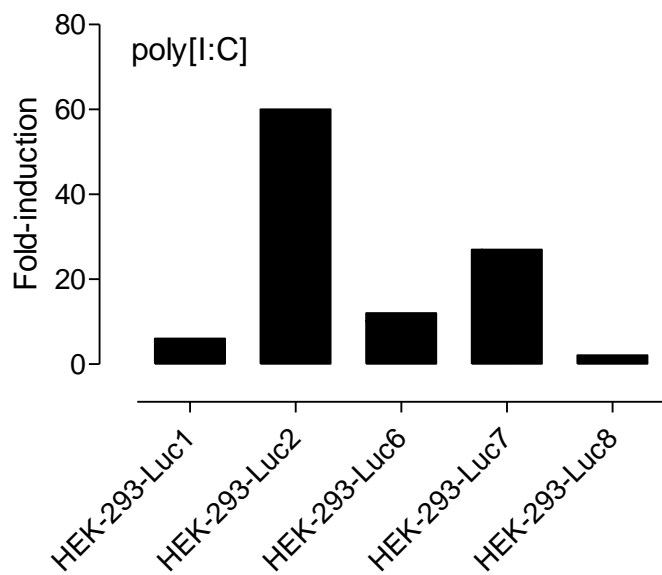

# Supplementary Figure S3

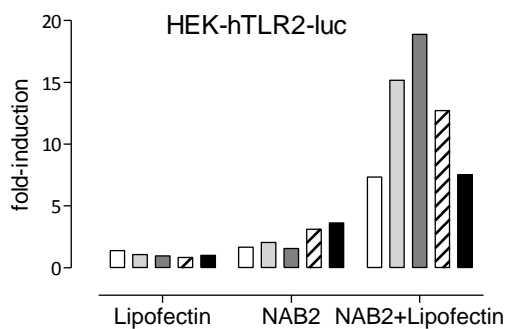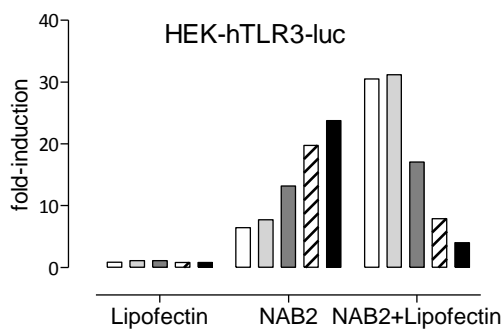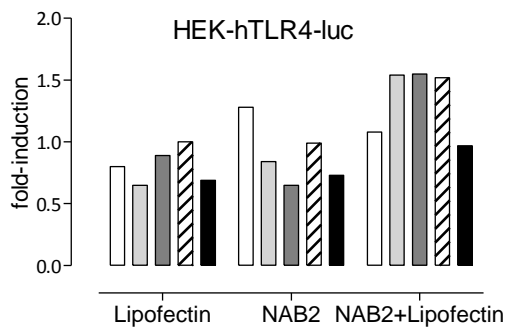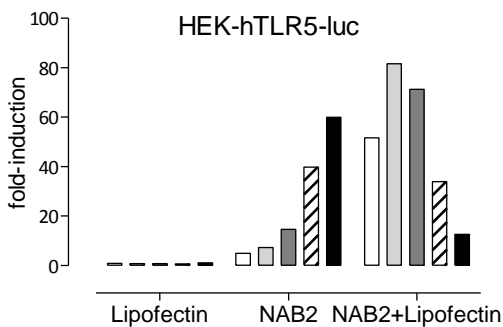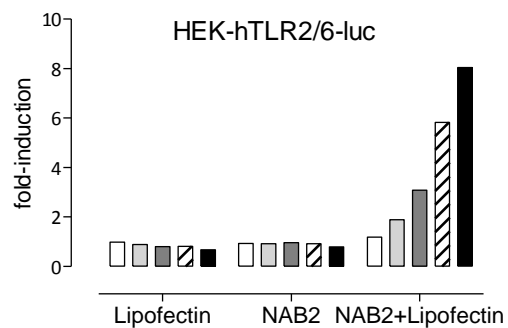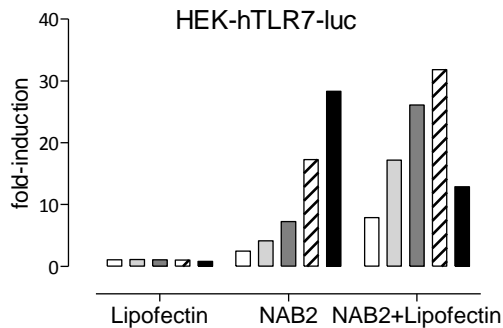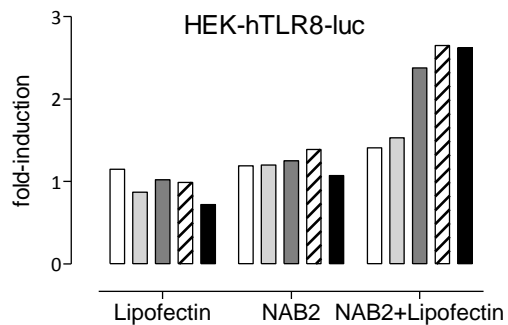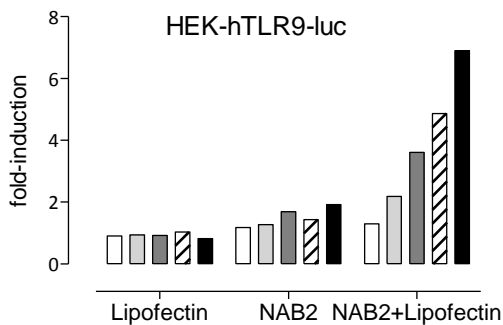

# Supplementary Figure S4

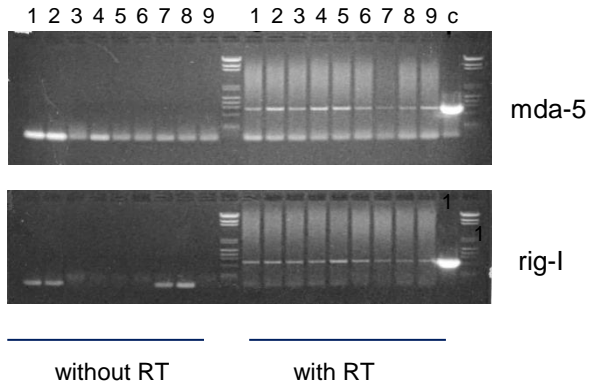

## Supplementary Figure S5

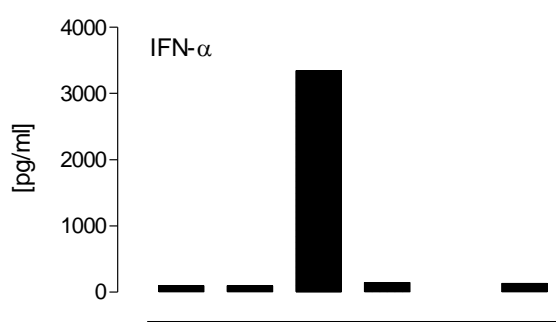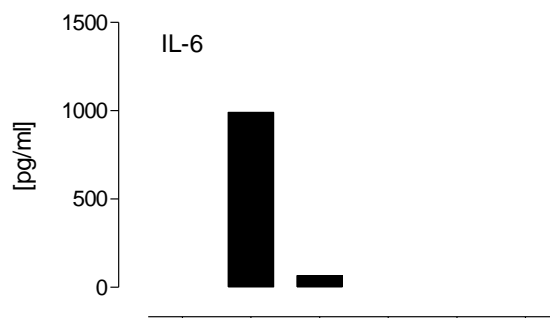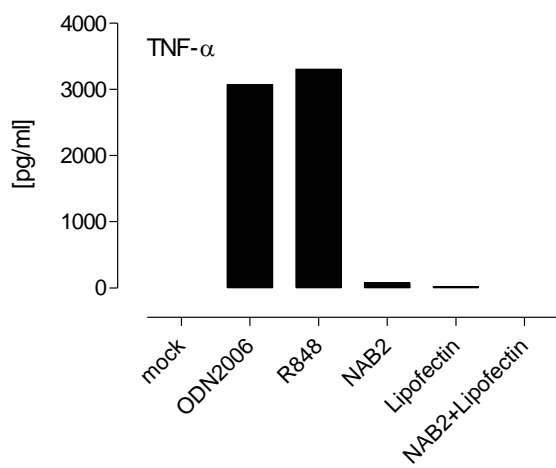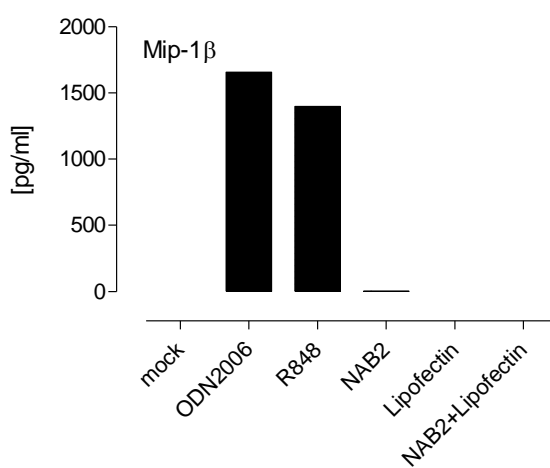



## Supplementary Figure S6:

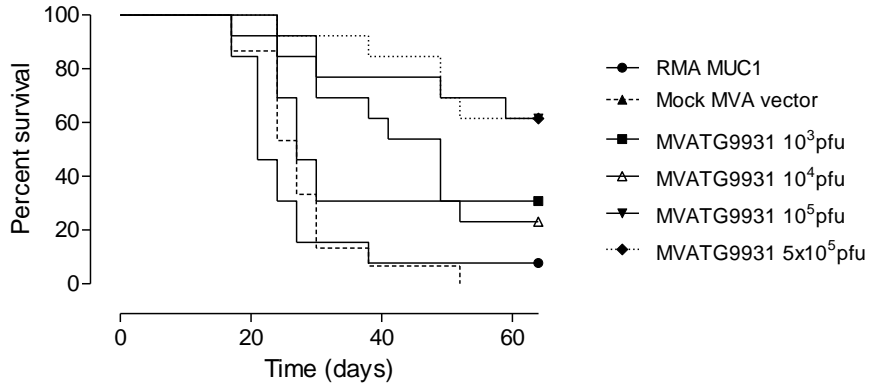

# Supplementary Figure S7

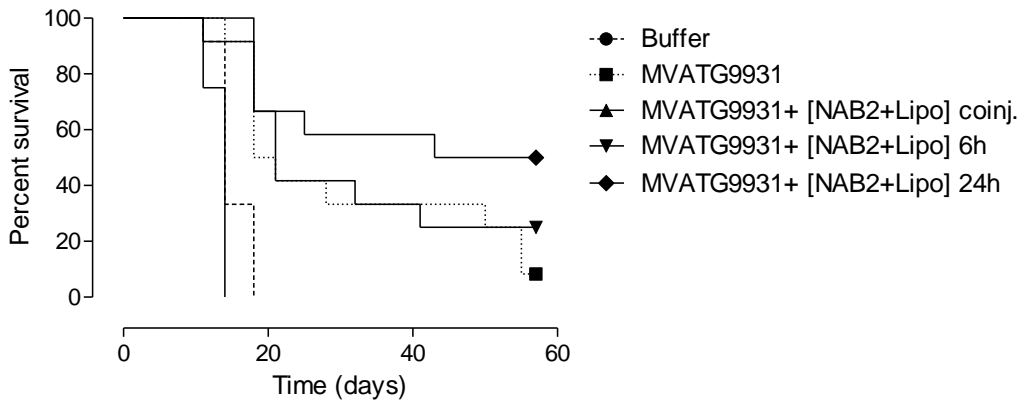

## Supplementary Figure S8

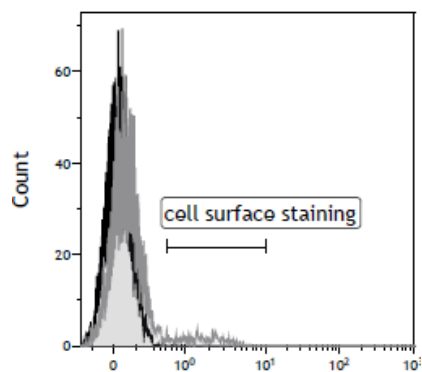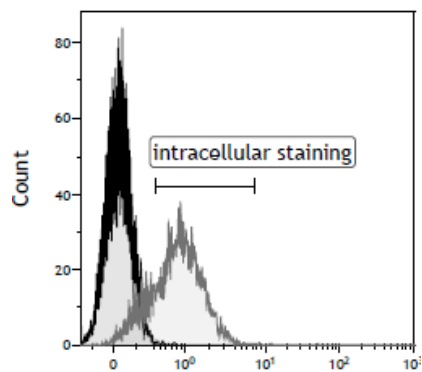

TLR3 →

## Supplementary data: sequence alignment:

NAB2 derived from Sc JC7 and ScV L-BC (genebank: U01060). 25 bp on 5' and 3' extremities correspond to primer sequences.

```
1 GAATTTTTTCGGTGAACCGGAATTATGTCGTCTCTGTTAAATTCATTA 50
  ||||||||||||||||||||||||||||||||||||||||||||||||
1 GAATTTTTTCGGTGAACCGGAATTATgtcgctctctgttaaattcattacta 50
  .
51 CCAGAATATTTTAAACCTAAAACCTAATTTGAATATCAACTCTTCTAGGGT 100
  ||||||||||||||||||||||||||||||||||||||||||||||||
51 ccagaatatttttaaacctaaaactaatttgaatatcaactcttctagggt 100
  .
101 CCAATATGGCTTTAATGCTCGCATTGATATGCAGTATGAAGACGATAGTG 150
  ||||||||||||||||||||||||||||||||||||||||||||||||
101 ccaatatggcttttaatgctcgcattgatatgcagtatgaagacgatagtg 150
  .
151 GGACTAGAAAAGGCTCAAGACCCAATGCATTTATGTCTAACACAGTTGCT 200
  ||||||||||||||||||||||||||||||||||||||||||||||||
151 ggactagaaaaggctcaagacccaatgcattttatgtctaacacagttgct 200
  .
201 TTTATAGGAACTATGAAGGTATTATTGTTGATGACATTCCGATATTGGA 250
  ||||||||||||||||||||||||||||||||||||||||||||||||
201 tttataggaaactatgaaggattatttggttgatgacattccgatattgga 250
  .
251 TGGTCTTAGGGCCGACATTTTTGATACTCATGGTGACTTAGACATGGGCC 300
  ||||||||||||||||||||||||||||||||||||||||||||||||
251 tggctcttagggccgacatTTTTGATACTCATGGTGACTTAGACATGGGCC 300
  .
301 TCGTTGAGGATGCATTGTCTAAGAGTACCATGATTAGAAGGAATGTACCA 350
  ||||||||||||||||||||||||||||||||||||||||||||||||
301 tcgttgaggatgcattgtctaaagagtaccatgattagaaggaatgtacca 350
  .
351 ACTTATACTGCTTACGCGAGTGAATTACTGTATAAGAGAAACCTTACATC 400
  ||||||||||||||||||||||||||||||||||||||||||||||||
351 acttatactgcttACGCGAGTGAATTACTGTATAAGAGAAACCTTACATC 400
  .
401 TCTATTTTACAATATGCTCCGTTTATACTACATTAAAAAATGGGGCAGTA 450
  ||||||||||||||||||||||||||||||||||||||||||||||||
401 tctatTTTACAATATGCTCCGTTTATACTACATTAAAAAATGGGGCAGTA 450
  .
451 TTAAGTATGAAAAAGATGCCATCTTTTATGATAATGGCCACGCCTGTCTT 500
  ||||||||||||||||||||||||||||||||||||||||||||||||
451 ttaagtatgAAAAAGATGCCATCTTTTATGATAATGGCCACGCCTGTCTT 500
  .
501 TTAAACAGGCAATTGTTTCCAAAGTCTCGTGATGCTTCTTTGGAATCAAG 550
  ||||||||||||||||||||||||||||||||||||||||||||||||
501 ttAAACAGGCAATTGTTTCCAAAGTCTCGTGATGCTTCTTTGGAATCAAG 550
  .
551 CCTCTCTTTGCCTGAGGCTGAAATTGCAATGCTTGATCCTGGCCTGGAAT 600
  ||||||||| ||||||||||||||||||||||||||||||||||||||||
551 cctctctTTTGCCTGAGGCTGAAATTGCAATGCTTGATCCTGGCCTGGAAT 600
  .
601 TTCCAGAAGAGGATGTGCCTGCAATTTTATGGCACGGCAGAGTGTATCC 650
  ||||||||||||||||||||||||||||||||||||||||||||||||
601 ttCCAGAAGAGGATGTGCCTGCAATTTTATGGCACGGCAGAGTGTATCC 650
  .
  .
  .
  .
  .
  .
```

|      |                                                      |      |
|------|------------------------------------------------------|------|
| 651  | AGAGCAACGTGTATCTTAGGGCAAGCTTGCTCAGAGTTCGCGCCTCTGGC   | 700  |
|      |                                                      |      |
| 651  | agagcaacgtgtatcttagggcaagcttgctcagagttcgcgcctctggc   | 700  |
|      | .                                                    |      |
| 701  | CCCCTTTTCGATTGCGCATTATTCACCACAATTGACGAGAAAACACTATTTG | 750  |
|      |                                                      |      |
| 701  | ccccttttcgattgcgcattattcaccacaattgacgagaaaactatttg   | 750  |
|      | .                                                    |      |
| 751  | TCAATGCGCCCCTGGGATTGAGCCTAGCTCCGGGCGGTATACTCACGAG    | 800  |
|      |                                                      |      |
| 751  | tcaatgcgcccctgggattgagcctagctccgggCGGTataactcacgag   | 800  |
|      | .                                                    |      |
| 801  | GATGTAAAAGATGCGATTACGATCCTTGTGTCTGCAAACCAGGCTTATAC   | 850  |
|      |                                                      |      |
| 801  | gatgtaaaagatgCGattacgatccttGTgtctgcaaaccaggcttatac   | 850  |
|      | .                                                    |      |
| 851  | TGACTTTGAAGCAGCATACTTGATGCTTGCTCAAACGTTGGTCTCACCTG   | 900  |
|      |                                                      |      |
| 851  | tgactttgagcagcacttgatgcttgctCAAacgttgGTctcacctg      | 900  |
|      | .                                                    |      |
| 901  | TACCACGCACTGCCGAAGCAAGTGATGGTTCATCAATGCTGGCATGGTC    | 950  |
|      |                                                      |      |
| 901  | taccacgcactgCCgaagcaagtGatggttcAtcaatgctggcatggtc    | 950  |
|      | .                                                    |      |
| 951  | AATATGCCAACTTTGTCATGTGCAAATGGTTATTATCCAGCACTGACCAA   | 1000 |
|      |                                                      |      |
| 951  | aatatGCCaactttgtcatgtGcaaATggttattatCCagcactGaccaa   | 1000 |
|      | .                                                    |      |
| 1001 | TGTCAATCCTTACCACCGGCTAGACACATGGAAAGATACGTTAAATCATT   | 1050 |
|      |                                                      |      |
| 1001 | tgtcaatccttaccacCGGctagacacatGGaaagataCGTTAAatcatt   | 1050 |
|      | .                                                    |      |
| 1051 | GGGTGGCTTATCCCGACATGCTGTTTTACCATTTCAGTGGCAATGATTGAG  | 1100 |
|      |                                                      |      |
| 1051 | gggtggcttatCCcgacatGctgttttaccattTCagtggcaatgattgag  | 1100 |
|      | .                                                    |      |
| 1101 | AGCTGCTATGTTGAACTCGGGAATGTGGCTCGTGTGTCAGACAGTGATGC   | 1150 |
|      |                                                      |      |
| 1101 | agctgctatgTTgaactCGggaatgTggctCGTgtgTcagacagtgatgc   | 1150 |
|      | .                                                    |      |
| 1151 | AATAAACAATACTACTTTCCTGAGCTATCAGTGCAAGGACGGCCTGTTA    | 1200 |
|      |                                                      |      |
| 1151 | aataaacaatactACTttcactgagctatcagtgcaaggacggcctgtta   | 1200 |
|      | .                                                    |      |
| 1201 | TGAATCGAGGAATTATTGTAGATCTGACACTTGTGGCAATGCGTACTGGT   | 1250 |
|      |                                                      |      |
| 1201 | tgaatCGaggaattattgtagatctgacacttGTggcaatgCGtactggT   | 1250 |
|      | .                                                    |      |
| 1251 | AGGGAGATCTCACTACCTTACCCGGTCAGCTGTGGCCTGACCCGTACAGA   | 1300 |
|      |                                                      |      |
| 1251 | agggagatctcactaccttACCCggTCagctGTggcctGaccCGtacaga   | 1300 |
|      | .                                                    |      |
| 1301 | CGCGTTATTGCAAGGTACTGAGATTCACGTTCCAGTTGTTGTCAAAGATA   | 1350 |
|      |                                                      |      |
| 1301 | cgcgttattGCAaggtactgagattCACgttccagttGttgtCAAagata   | 1350 |
|      | .                                                    |      |
| 1351 | TCGACATGCCCCAGTATTACAACGCGATTGATAAGGATGTTATTGAGGGG   | 1400 |
|      |                                                      |      |
| 1351 | tCGacatGCCCCagTattacaACgCGattGATAaggatGttattGAGggg   | 1400 |
|      | .                                                    |      |
| 1401 | CAGGAAACTGTGATTAAAGTGAAACAGCTGCCACCAGCTATGTATCCAAT   | 1450 |

|||||  
1401 caggaaactgtgattaagtgaacagctgccaccagctatgtatccaat 1450  
TTATACTTACGGGATCAACACTACTGAATTCTATTCTGACCATTTTGAAG 1500  
|||||  
1451 ttatacttacggcatcaacactactgaattctattctgaccatTTTgaag 1500  
ACCAGGTACAAGTTGAAATGGCACCAATCGATAATGGAAAAGCAGTTTTT 1550  
|||||  
1501 accaggtacaagttgaaatggcaccaatcgataatggaaaagcagTTTT 1550  
AACGATGCAAGAAAGTTTTTCGAAATTTATGTCCATAATGCGCATGATGGG 1600  
|||||  
1551 aacgatgcaagaaagTTTTcgaatTTTatgtccataatgCGCATGATggg 1600  
GAATGATGTTACTGCTACTGATTTAGTTACAGGTAGAAAAGTGTGCAATT 1650  
|||||  
1601 gaatgatgTTactgctactgatttagttacaggtagaaaagtgtcgaatt 1650  
GGGCCGACAACATCAGGGCGTTTTCTTGTACACGGATGTGAAGTATGAA 1700  
|||||  
1651 gggccgacaactcatcagggcgTTTTcttGTACACGGATGTGAAGTATgaa 1700  
GGACAAACTGCCTTTTTGGTTGATATGGATACTGTCAAGGCGAGAGACCA 1750  
|||||  
1701 ggacaaactgcctTTTTggTTgatatggatactgtcaaggcgagagacca 1750  
CTGTTGGGTGTCAATTGTTGATCCTAATGGTACAATGAACTTGTCATATA 1800  
|||||  
1751 ctgTTgggtgtcaattgTTgatcctaattggtacaatgaacttGTcatata 1800  
AGATGACCAATTTTAGAGCAGCAATGTTTTCTAGAAACAAGCCCTTGAT 1850  
|||||  
1801 agatgaccaatTTtagagcagcaatgTTTTctagaaacaagcccttGTat 1850  
ATGACAGGGGGGTGAGTCAGGACCATAGCTACTGGCAATTATCGAGATGC 1900  
|||||  
1851 atgacaggggggTcagtcaggaccatagctactggcaattatcgagatgc 1900  
TGCTGAAAGATTACGTGCAATGGATGAAACGCTCAGATTAACCTTTTA 1950  
|||||  
1901 tgctgaaagattacgtgcaatggatgaaacgctcagattaaacctTTta 1950  
AGATTACTGAGAAGTTGGATTTTCGTGTAGCAGCTTACGCGATACCAAGT 2000  
|||||  
1951 agattactgagaagttggatTTTCgtgtagcagcttacgCGataccaagt 2000  
TTGTCGGGCAGCAATATGCCATCCTTACACCATCAGGAACAACACTACAGAT 2050  
|||||  
2001 ttgtcgggcagcaatatgccatcctTACaccatcaggaacaactacagat 2050  
ATCAGAAGTGGACGCGGAACCAATCAATCCTATAGGAGAGGACGAACTTC 2100  
|||||  
2051 atcagaagtggacgCGgaaccaatcaatcctataggagaggacgaacttc 2100  
CACCGGATATAGAATAGGTGTGCGAAGACGATGAGGACTTAGATATTGGTA 2150  
|||||  
2101 caccggatataagaataggtgtCGaagacgatgaggacttagatattggta 2150  
CGGTCAAATACATTGTGCCATTGTATTTGAACGGTGATAATGTGGCACAA 2200  
|||||

```

2151  cgggtcaaatacattgtgcccattgtatattgaacggtgataatgtggcacia 2200
      .               .               .               .
2201  AATTGTTTAGAAGCAACACACGTGCTTATCAAAGCTTGTAGTATTGCGAA 2250
      |||
2201  aattgtttagaagcaacacacgtgcttatcaaagcttgtagtagtattgcgaa 2250
      .               .               .               .
2251  CCGGATTGTAGATGACGGAGAGGGTCACTGTTTCACACAGCAAGGGCTGG 2300
      |||
2251  ccggattgttagatgacggagaggggtcactgtttcacacagcaagggctgg 2300
      .               .               .               .
2301  CGCAGCAGTGGATCTTCCATAGGGGGGAGATGATATTTGTGAAGGCGGTA 2350
      |||
2301  cgcagcagtggatcttccataggggggagatgatattttgtgaaggcggtta 2350
      .               .               .               .
2351  CGCATTGGTCAACTCAATGCATATTATGTAGACTATAAGAACGTCACAAA 2400
      |||
2351  cgcattggtcaactcaatgcatattatgtagactataagaacgtcacaaa 2400
      .               .               .               .
2401  TTATAGTCTTAAAACCGCTGCTCAAGTAGGAGCGACGATATCAAATAACT 2450
      |||
2401  ttatagtccttaaaccgctgctcaagtaggagcgacgatatacaataact 2450
      .               .               .               .
2451  TACGCCACGGATTTGTTGACAATCAACAAGACGCATACACGCGCTTGGTT 2500
      |||
2451  tacgccacggattttgttgacaatcaacaagacgcatacacgcgcttggtt 2500
      .               .               .               .
2501  GCCAACTACTCTGATACGCGGAAGTGGATACGTGACAATTTTACATATAA 2550
      |||
2501  gccaaactactctgatacgcggaagtggatacgtgacaatTTTACATATAA 2550
      .               .               .               .
2551  TTATAATATGGAGAAAGAAAAGTATAGGATAACCCAATACCACCATACAC 2600
      |||
2551  ttataaatatggagaaagaaaagtataggataactcaataaccaccacacac 2600
      .               .               .               .
2601  ATGTGAGGTTGAAAGATTTGTTTCCATCCAGGAAAATAGTTAAACTAGAG 2650
      |||
2601  atgtgaggttgaaagattttgTTTCCATCCAGGAAAATAGTTAAACTAGAG 2650
      .               .               .               .
2651  GGATATGAAGCCTTGTTGGCAATGATGCTAGACAGGTTTAACAACATAGA 2700
      |||
2651  ggatatgaagccttgTTGGCAATGATGCTAGACAGGTTTAACAACATAGA 2700
      .               .               .               .
2701  GTCAACACATGTAACCTTCTTCACATATTTAAGAGCACTACCTGACCGTG 2750
      |||
2701  gtcaacacatgtaaccttcttccacatatttaagagcactacctgaccgtg 2750
      .               .               .               .
2751  AAAAAGAAGTCTTTATTAGCTTAGTCTTAAACTATAATGGCCTTGGCAGA 2800
      |||
2751  aaaaagaagtctttattagcttagctcttaactataatggccttggcaga 2800
      .               .               .               .
2801  GAGTGTTGAAGTCTGAAGGTGTTAGGGCTAAACAAGCACAAGGTACTGT 2850
      |||
2801  gagtggttgaagtctgaagggtgTTAGGGCTAAACAAGCACAAGGTACTGT 2850
      .               .               .               .
2851  GAAATACGATATGAGTAAACTATTTGAACTGAATGTACTAGAGAACGGAG 2900
      |||
2851  gaaatac gatatgagtaaactatTTGAACTGAATGTACTAGAGAACGGAG 2900
      .               .               .               .
2901  TTGACGAAGAAGTTGACTGGGAGAAAGAGAAACGCAACAGGTCAGATATC 2950
      |||
2901  ttgacgaagaagttgactgggagaaagagaaacgcaacaggacagatatc 2950

```







```
||||||| |
4450 tcgtatgggtgtgagcaacttagtaatgggtgtagcaaaatcaatcctg 4499
      .
4500 CAAAAGCTAATGTGCTAGCCAAATCAGGAGATCCTACAAAATGGCTTGCA 4549
      |
4500 caaaagctaataatgtgctagccaaatcaggtgatcctacaaaatggcttgca 4549
      .
4550 GTCCTTACATGATATACAGGCAACCACATAAGACCTGAGAACAAAGAGTA 4599
      |
4550 gtccttacatgatatacaggcaaccacataagacctgagaaCAAAGAGTA 4599
      .
4600 CATACGATACTACGCA 4615
      |
4600 CATACGATACTACGCA 4615
```
